# Supplementary material for: The prognostic model of low-grade glioma based on m6A-associated immune genes and functional study of FBXO4 in the tumor microenvironment
Source: PeerJ. 2025 Mar 21;13:e19194. doi: 10.7717/peerj.19194 (PMC11932111; doi:10.7717/peerj.19194)
Supplement: Supplemental Information 2 [file peerj-13-19194-s002.xlsx]

## Sheet: qpcr
relative mRNA of expression of FBXO4
HA800	U118	U87	U251
0.951697	1.75759	2.19172	4.2991
0.932394	1.53734	2.23907	4.65545
1.11591	1.674	2.27837	3.60284
relative mRNA of expression of FBXO4
u87
nc	si1	si2	si3
0.941384	0.282242	0.304933	0.846342
1.03167	0.290806	0.305288	0.929128
0.890432	0.291974	0.364955	0.927799
1.08186	0.286846	0.349883	0.679799
1.00245	0.269093	0.367979	0.616994
1.0522	0.276543		0.666447
relative mRNA of expression of FBXO4
u251
nc	si1	si2	si3
1.16953	0.154099	0.452526	0.4644
0.828494	0.169833	0.410361	0.576588
1.00197	0.0845841	0.364297	0.532015

## Sheet: cck8
OD value(450nm）
U251
time	si1			nc
24	0.397	0.398	0.403	0.395	0.407	0.396
48	0.558	0.518	0.539	0.58	0.555	0.584
72	0.474	0.493	0.483	0.578	0.588	0.585
96	0.738	0.757	0.74	0.885	0.887	0.884
120	1.244	1.153	1.135	1.577	1.43	1.489
U87
time	si1				nc
24	0.212	0.211	0.217	0.214	0.22	0.22	0.226	0.224
48	0.247	0.25	0.253	0.247	0.267	0.281	0.261	0.249
72	0.309	0.303	0.304	0.308	0.416	0.419	0.428	0.429
96	0.614	0.634	0.59	0.56	0.659	0.684	0.657	0.668
120	1.574	1.727	1.566	1.596	1.75	1.936	1.981	1.853
													z

## Sheet: invasion
cell number of invasion（X100）
U87		U251
nc	si-fbxo4	nc	si-fbxo4
927	325	522	435
832	316	603	379
871	323	551	395
